# Supplementary material for: Role of G-protein-coupled Receptor-related Genes in Insecticide Resistance of the Mosquito, Culex quinquefasciatus
Source: PubMed Central journal article supplement (PMC4178296; doi:10.1038/srep06474), 2014-09-29
Supplement: srep06474-s1.pdf [file srep06474-s1.pdf]

Role of G-protein-coupled Receptor-related Genes in Insecticide Resistance of the Mosquito,

*Culex quinquefasciatus*

Ting Li, Lena Liu, Nannan Liu\*

**Supplement Information**

Table S1. Oligonucleotide primers used in qRT-PCR and PCR reactions

| Transcript ID <sup>a</sup> | Accession No. | Gene <sup>b</sup>                       | Forward Primer (5' to 3') <sup>c</sup> | Reverse Primer (5' to 3') <sup>c</sup> |
|----------------------------|---------------|-----------------------------------------|----------------------------------------|----------------------------------------|
| CPIJ013660                 | XM_001864055  | octopamine receptor oamb                | CGAACCCACATGGGCAAGAACTTT               | TATACAGAACCCGGACAGCAGGTT               |
| CPIJ015294                 | XM_001865540  | dopamine receptor, invertebrate         | TCTACAAGGTGAACAAGGCGTCCA               | ATGATGTTGCACGTGAAGAAGGGC               |
| CPIJ019015                 | XM_001869366  | octopamine receptor oamb                | TCAGTATGGAAATCACACGCCGGT               | TCGTCGAAACCGGGAAAGGAAGAT               |
| CPIJ018698                 | XM_001869052  | ribosomal protein S6                    | ACCACATTCCGGATTGCTGATTGC               | CAGGATGCACAGTTTGCGGATGTT               |
| CPIJ001044                 | XM_001842661  | muscarinic acetylcholine receptor gar-3 | CGCTGTTGTGTGATTTGTGGCTCT               | TTGGTTCGCCAGCTGCGATATTG                |
| CPIJ008330                 | XM_001849662  | conserved hypothetical protein          | TGGTCAGCATGATCCCGGACATTT               | AATCGTGTAACCGAGTCCTGGCT                |
| CPIJ011883                 | XM_001863239  | conserved hypothetical protein          | AGCTGCAGAACGTCACCAACTACT               | TGAACCCAAACGGCCAGTAACCTA               |
| CPIJ003188                 | XM_001844724  | g-protein coupled receptor              | ATACCAACTTCCGGGATGCCTTCA               | ACGGGACGATTTCTGTTGTGGAGA               |

---

|                |                      |                                   |                           |                              |
|----------------|----------------------|-----------------------------------|---------------------------|------------------------------|
| CPIJ0<br>16039 | XM_<br>00186<br>6016 | conserved hypothetical<br>protein | CAAGAACTTCAAGCACAGGCCGTT  | TGAAACGACCGTAATTTCCGCTGC     |
| CPIJ0<br>15747 | XM_<br>00186<br>6028 | 5-hydroxytryptamine<br>receptor 1 | GCAACGCGACATTCCCAAGTTGTA  | ACCACACTGAGTGCGTCTGAAGAT     |
| CPIJ0<br>14487 | XM_<br>00186<br>4681 | beta adrenergic<br>receptor       | CATCTTTGGCAACCTGCTGGTCAT  | TGACAGCGTACGGCTTGTTCACTA     |
| CPIJ0<br>13218 | XM_<br>00186<br>3307 | tyramine/octopamine<br>receptor   | TAAGACTAATCCAACCAGCGCCGT  | GCGGAACGATTGTTTCATGCGACT     |
| CPIJ0<br>03421 | XM_<br>00184<br>5139 | conserved hypothetical<br>protein | ATTGCCAAGAACCTGATTGCGAGC  | AGCAAACAGGTGAAGAATGCGAGC     |
| CPIJ0<br>14065 | XM_<br>00186<br>4128 | neuromedin-U<br>receptor 1        | TCGAGCTGTGACGTTTGTGTTCT   | CGAGCGCAACTTCAACCCAATCAA     |
| CPIJ0<br>05574 | XM_<br>00184<br>7763 | sulfakinin receptor               | TACACATACGTCAGCAGCAACGGA  | AGCAACAGCACAGACAGAGGAAG<br>A |
| CPIJ0<br>16281 | XM_<br>00186<br>6703 | sulfakinin receptor               | GCGCACCATCACCAACCTATTTCT  | TGCCACTGAAGAGGCTTGCAGATA     |
| CPIJ0<br>13069 | XM_<br>00186<br>3157 | neuropeptide Y<br>receptor type 2 | ACGTGGTCTTCCGGAATAAAGCCA  | CGTGTGACAAATGAGCTTGCCGAA     |
| CPIJ0<br>07187 | XM_<br>00184<br>9241 | FMRFamide receptor                | TGTTTCATCTACCTGCTGCCGTTCA | GCAGAAACACAATGACCACGCAGA     |
| CPIJ0<br>06984 | XM_<br>XM_           | g-protein coupled<br>receptor     | CGAAGCTGAACTTGACGTTGGACA  | TTTGCGGTTGTTGCTGTACTGCTC     |

---

---

|                |                      |                                        |                          |                          |
|----------------|----------------------|----------------------------------------|--------------------------|--------------------------|
|                | 00184                |                                        |                          |                          |
|                | 8696                 |                                        |                          |                          |
| CPIJ0<br>18265 | XM_<br>00186<br>9016 | g-protein coupled<br>receptor          | GCCTAGAGGCGATACAAATTGTTG | CACCATGTGGCGCTGTTGTTGATT |
| CPIJ0<br>14670 | XM_<br>00186<br>5310 | endothelin B receptor                  | AGAATACCAGTGTAGCGGTGGCAA | CCAAACCAGCAACACCACGATCAA |
| CPIJ0<br>12071 | XM_<br>00186<br>2415 | myokinin receptor                      | TGTGTGCGGACGGAGAGGATAAAT | ATCCATATCACCAGCGAGTTGCCT |
| CPIJ0<br>18504 | XM_<br>00186<br>8775 | neuropeptide Y<br>receptor             | ACAGCTGCTACAACCCGATCATCT | GCTGGTGCTAACATCACTTCGCTT |
| CPIJ0<br>10469 | XM_<br>00185<br>4800 | somatostatin receptor<br>type 5        | ACTCGGTGTACGAGATTTGCCCAT | TATCAGAAAGCACTGGTCCGCGAT |
| CPIJ0<br>11191 | XM_<br>00185<br>9633 | somatostatin receptor                  | TATGCCGACCACGTACACACTGTT | TGTGCATCGTGGCAATCAAGAACG |
| CPIJ0<br>03158 | XM_<br>00184<br>4694 | G protein-coupled<br>receptor          | ACCGCGAAACCTCCTCACAGTAAT | CTGATTGCCGTCAGCGGCATATTT |
| CPIJ0<br>11716 | XM_<br>00186<br>2544 | g-protein coupled<br>receptor          | TTGCCCTGGGTATCAATCTTCCGT | TGGCGAACAGAAAGTACCAGCTCT |
| CPIJ0<br>16695 | XM_<br>00186<br>7185 | g-protein coupled<br>receptor          | TTGCCCTGGGTATCAATCTTCCGT | TGGCGAACAGAAAGTACCAGCTCT |
| CPIJ0<br>06269 | XM_<br>00184<br>7618 | cardioacceleratory<br>peptide receptor | GCATCATTCCAAAGGCGAAGGTGA | TTGGTCTGCGTTTCCGGAATTTGG |

---

---

|                |                      |                                                |                          |                           |
|----------------|----------------------|------------------------------------------------|--------------------------|---------------------------|
| CPIJ0<br>07712 | XM_<br>00184<br>9183 | leucine-rich<br>transmembrane protein          | GTTTCGGTTGGTTGCCATTCTGT  | ATTGTTTCGTGGCCACTTCGGATG  |
| CPIJ0<br>11619 | XM_<br>00186<br>1641 | leucine-rich<br>transmembrane protein          | AGCCGGAAATAGCATAAGCTCCCT | TGAAGGCGTCCTGGTGGATAAAGT  |
| CPIJ0<br>01199 | XM_<br>00184<br>2816 | gonadotropin-<br>releasing hormone<br>receptor | TCTGTCCGTGGTGATTACGCTGTT | GCGGAATCATGATGAATGCCACCA  |
| CPIJ0<br>05000 | XM_<br>00184<br>6589 | short wavelength<br>sensitive opsin            | TGCTGGCGTTGATCTACTTTGTGC | AAGGCATTACCAGAAACATCGGC   |
| CPIJ0<br>09246 | XM_<br>00185<br>1105 | ultraviolet wavelength<br>sensitive opsin      | AATCGTAAGCCACGTCGTGAACCA | CCACGAAGCCACAAACAGGAAACA  |
| CPIJ0<br>13408 | XM_<br>00186<br>3511 | short wavelength<br>sensitive opsin            | CAAGCATCGCTGTTTGTGCTGCTA | AACACCATTGGAATCGCGTAAGCC  |
| CPIJ0<br>04067 | XM_<br>00184<br>5645 | opsin (long<br>wavelength sensitive)           | TCGCACTCGTTACGATCTCGCTTT | ACTTGGGATGACTGATGCCGTACA  |
| CPIJ0<br>12052 | XM_<br>00186<br>2130 | long wavelength<br>sensitive opsin             | TCAAGATCCTGATGGTGTGGGCTT | ACACGAAGATGGCGTAGACGATGA  |
| CPIJ0<br>11571 | XM_<br>00186<br>2163 | long wavelength<br>sensitive opsin             | TCAACAGACCAGCGCTGAGATCAA | TGATTCCGTACACGATCGGGTTGT  |
| CPIJ0<br>11573 | XM_<br>00186<br>2165 | long wavelength<br>sensitive opsin             | ATGTGCCAGGTTTACGCCATGTTG | GAGCAGCGCATTGTTGAAGGTCAT  |
| CPIJ0<br>11574 | XM_<br>00186         | long wavelength<br>sensitive opsin             | TCTACTTTGCGCCTCTGCTGATGA | CAGCTTCATTTCCGGTGCTGGTGTT |

---

---

|                |                      |                                       |                          |                          |
|----------------|----------------------|---------------------------------------|--------------------------|--------------------------|
|                | 2166                 |                                       |                          |                          |
| CPIJ0<br>11983 | XM_<br>00186<br>2303 | conserved hypothetical<br>protein     | GAGCCTGCCCAACTTTAAGCCAAA | ATGATGCAGAACGGCAACCAGAAC |
| CPIJ0<br>13056 | XM_<br>00186<br>3451 | long wavelength<br>sensitive opsin    | CGATGGTGCAGATCTTTGGCGTTT | CAGTGGCGCAAAGTACACGAACAT |
| CPIJ0<br>11419 | XM_<br>00186<br>1603 | unknown wavelength<br>sensitive opsin | TGTAACTCCGCTGGGTTCGATGA  | ACTGCGAGTGGTTCATCTCCTGTT |
| CPIJ0<br>14334 | XM_<br>00186<br>4516 | pteropsin                             | TCATCCTGCTGAACCTGGTGTGTT | TATGCCCAGCAGGGACATGAAGAA |
| CPIJ0<br>15116 | XM_<br>00186<br>5344 | wd-repeat protein                     | CCAGCTGGTTCTGCTGCATTTGAT | TGTCCACACCCGTGAACAGAATGT |
| CPIJ0<br>00143 | XM_<br>00184<br>1761 | g-protein coupled<br>receptor         | GTGCTGACAAGACGTGAAATGCGT | ACACTGCGTAGGGCACATAATCCA |
| CPIJ0<br>06507 | XM_<br>00184<br>8139 | g-protein coupled<br>receptor         | ACTTCACCCAGATACTGCACACCA | TCGTGAAGACAAAGTACGTCGGCA |
| CPIJ0<br>11547 | XM_<br>00186<br>1835 | conserved hypothetical<br>protein     | AGCTCCAGTTGGGAATGAACGAGA | ACGCTGATGATCTTGCTGTTTGCG |
| CPIJ0<br>11549 | XM_<br>00186<br>1837 | conserved hypothetical<br>protein     | AGTGTTCCACATGACGAGCTTCT  | TCCAAACAAGGACAACAAGCAGCC |
| CPIJ0<br>17258 | XM_<br>00186<br>7508 | neural-cadherin                       | ATCATGCCACAGATTCCTGGACCT | GACATCCCGCAATTGTTCCGTTGT |
| CPIJ0          | XM_                  | calcitonin receptor                   | TCTGCTGCACTATCTGATGCTGGT | AGTTGTTCCGGAAGGTTGCGTAGA |

---



---

|                |                      |                                   |                          |                           |
|----------------|----------------------|-----------------------------------|--------------------------|---------------------------|
| CPIJ0<br>00410 | XM_<br>00184<br>2028 | protein smoothed<br>precursor     | AGCGATTGGGAAGATCGGAAAGGA | ATCGTAATCGTCAACACCAGCGGA  |
| CPIJ0<br>11757 | XM_<br>00186<br>1922 | 5HT-dro2A receptor                | ACTCTCCACCATTTCTAACGGCCA | TCCTCGGCGAAGCTTGTA ACTTGA |
| CPIJ0<br>20007 | XM_<br>00187<br>0341 | conserved hypothetical<br>protein | TACTGTTCTGAGAAATCGCCGCT  | CACGCCCAACACAAACGAGAAGTT  |
| CPIJ0<br>11105 | XM_<br>00186<br>1425 | pyrokinin receptor                | TATCGAGTGCAAGCGATCCTCCAA | GTGCTCCATTGTGAGGCAACCAAA  |
| CPIJ0<br>11106 | XM_<br>00186<br>1426 | pyrokinin receptor                | GTTCAATCAGGTGGCCTGCATCAT | TTCGAACTTGCCGAAATGGGTGAC  |
| CPIJ0<br>09459 | XM_<br>00185<br>1355 | conserved hypothetical<br>protein | TCGCCTTGTCGTACCTGTTTGGAT | GGTCGTTTGTGAGCAGGCATTTC A |
| CPIJ0<br>19111 | XM_<br>00186<br>9507 | conserved hypothetical<br>protein | ACGATCGAGGCAGAACAATCACGA | TGGAGAAGTCGAACAGCGGTTTCT  |
| CPIJ0<br>00002 | XM_<br>00184<br>1620 | conserved hypothetical<br>protein | TGATGACCCTAGCTTTCCTGCCAA | TTCCGGACTGGCTTCATTAAGGGT  |
| CPIJ0<br>18293 | XM_<br>00186<br>8397 | Cap2b receptor                    | CGGCGACTCATGATGCTTCTTGTT | TTGATCAGCTCCATCAGGTTGGCT  |
| CPIJ0<br>15979 | XM_<br>00186<br>6120 | conserved hypothetical<br>protein | ACCAAACGACGACGACGATGAAGA | GGATGTGATGGTTGCCAATGTGGT  |
| CPIJ0<br>19916 | XM_<br>00187         | conserved hypothetical<br>protein | TGCTAGCCATCTTCACAGTGGTCA | TTGTTGAAGTGGGTGTTGCTGCTG  |

---

---

|                |                      |                                   |                           |                          |
|----------------|----------------------|-----------------------------------|---------------------------|--------------------------|
|                | 0156                 |                                   |                           |                          |
| CPIJ0<br>14753 | XM_<br>00186<br>5118 | conserved hypothetical<br>protein | CCAGAGCAAAGAGGAGCAAGTCAA  | TCGAGATGAACGTCAACGTGAGCA |
| CPIJ0<br>02213 | XM_<br>00184<br>3830 | Odorant receptor 94b              | ACCTGCTTATTTACGTTGGCAGC   | TCAAACGCCTGCAGTGTGTGAAAG |
| CPIJ0<br>03422 | XM_<br>00184<br>5140 | conserved hypothetical<br>protein | TGGTGCCCATTTGTCATCCTCAAGA | ACCCATACTTCGGGTGGTGAGTTT |
| CPIJ0<br>03420 | XM_<br>00184<br>5138 | conserved hypothetical<br>protein | ACGGCATCAACAAATCTGAGCAGC  | GTTGTGGCGTTGATGAAGCAACCT |
| CPIJ0<br>13535 | XM_<br>00186<br>3623 | GABA-B receptor                   | TGTGGGATAGTGGTGGCATTAGCA  | TGGCTTGGCATAACCTGGGATAGT |
| CPIJ0<br>13536 | XM_<br>00186<br>3624 | GABA receptor                     | TTATGTTACGGCGCATCTAGCCCT  | ATGAACACTTCTTCGGCTTGCTGG |
| CPIJ0<br>16679 | XM_<br>00186<br>6877 | conserved hypothetical<br>protein | TGGCGGTGTACTCACAAGAGGTTT  | ATGTTCCCGAGCAGCGATACGATT |
| CPIJ0<br>11717 | XM_<br>00186<br>2545 | g-protein coupled<br>receptor     | ATGACTTTGATACCGCTGTGGACG  | ATCAGCGTACGCCAGATTCACGAT |
| CPIJ0<br>16293 | XM_<br>00186<br>6977 | conserved hypothetical<br>protein | TTCCGGTCCAACACGAACCTCAA   | TTTCACGTCCCGCTCCTTGTACTT |
| CPIJ0<br>07715 | XM_<br>00184<br>9186 | G protein-coupled<br>receptor     | ATCTTCCCACAATCCTCTGCTCGT  | TCAGTGAAGCTGCCACGTTTTGTA |
| CPIJ0          | XM_                  | G protein-coupled                 | TGGCTTGGGTTATCTGGGACGAAA  | TCGAGCCGAACTCAGAAACTCGTA |

---



---

|       |       |                                |                           |                          |
|-------|-------|--------------------------------|---------------------------|--------------------------|
| 07716 | 00184 | receptor                       |                           |                          |
|       | 9187  |                                |                           |                          |
| CPIJ0 | XM_   |                                |                           |                          |
| 18158 | 00186 | frizzled-3 precursor           | TCCGGAAGCGTCGAGAAGAACTTT  | AGTTGTGGTGATGGTGTGTTGCG  |
|       | 8532  |                                |                           |                          |
| CPIJ0 | XM_   |                                |                           |                          |
| 07681 | 00184 | frizzled                       | TGATCGATTCGTCTCGGTCAGGT   | CCTGCGTAATCGTCGATAGCATCT |
|       | 9511  |                                |                           |                          |
| CPIJ0 | XM_   |                                |                           |                          |
| 07676 | 00184 | frizzled precursor             | TCTTCATGGCCCTGTACTTCTGCT  | AATCCTTCAACTTTGCCCAGTGCC |
|       | 9506  |                                |                           |                          |
| CPIJ0 | XM_   |                                |                           |                          |
| 07677 | 00184 | frizzled precursor             | CTTCTTCAGCGGCCTGTTCATTCT  | AGAAGATCTTGCACATCTGGCGGT |
|       | 9507  |                                |                           |                          |
| CPIJ0 | XM_   |                                |                           |                          |
| 07682 | 00184 | frizzled precursor             | CTTCTTCAGCGGTCTGTTCATCCT  | CACCATCTGGGCGTTGTATTTGGT |
|       | 9512  |                                |                           |                          |
| CPIJ0 | XM_   |                                |                           |                          |
| 08820 | 00185 | diuretic hormone receptor      | CACGCAGAAACCGGAAGAAGGTTT  | TCGACGGATCCAAAGCCGTGTAAA |
|       | 0657  |                                |                           |                          |
| CPIJ0 | XM_   |                                |                           |                          |
| 00651 | 00184 | dopamine receptor              | GACGTTGCGCCGGTGTCAATGATTT | TGAGCGGATCCTTGATGTGGATGT |
|       | 2362  |                                |                           |                          |
| CPIJ0 | XM_   |                                |                           |                          |
| 16678 | 00186 | corazonin receptor             | TTCTTCGGGATGTCCAACAGCCTA  | TGTTGCTTGTACTGATTGTGCCGC |
|       | 6876  |                                |                           |                          |
| CPIJ0 | XM_   |                                |                           |                          |
| 19566 | 00186 | G-protein coupled receptor     | TGGTGATAGCGTTCTTCCTGTGCT  | TGTACGTCAGGATTTCGAACGCGA |
|       | 9764  |                                |                           |                          |
| CPIJ0 | XM_   |                                |                           |                          |
| 11881 | 00186 | conserved hypothetical protein | AACCTTCAATTCCCGGAGTGACCT  | TGCAGAACAGCACATCCAGACAGA |
|       | 3237  |                                |                           |                          |

---

---

|                |                      |                                        |                          |                              |
|----------------|----------------------|----------------------------------------|--------------------------|------------------------------|
| CPIJ0<br>16282 | XM_<br>00186<br>6704 | CCK-like GPCR                          | TCATCAACACGATGGCCCTGTTCT | AAGCACCGAAACAGG TTCAGGAAG    |
| CPIJ0<br>06268 | XM_<br>00184<br>7617 | cardioacceleratory<br>peptide receptor | TCTCGACGCACTTTGTCAGGACTT | ATTGAATCGCTGCTGTGCTGGTTC     |
| CPIJ0<br>03873 | XM_<br>00184<br>5489 | beta adrenergic<br>receptor            | GCATCGAACGGTTGGCTTCATGTT | ATGATTGCGTACGCCTTGTTGACC     |
| CPIJ0<br>14488 | XM_<br>00186<br>4682 | beta adrenergic<br>receptor            | TCAACTCGACGCTCAATCCGCTTA | TTTGAGAAGCAGGGCAGTAGCGA<br>T |
| CPIJ0<br>14409 | XM_<br>00186<br>4626 | alpha-2 adrenergic<br>receptor         | GCGGTGGTGAAACCGTTGAAGTTT | GCCGCGTTATTGTTCTTGTTCCGA     |
| CPIJ0<br>11118 | XM_<br>00186<br>1441 | allatostatin receptor                  | CTGCCTTCCACATTGCGTTCTTCT | TTGCTCTTCTCGACTCTGCGGAA      |
| CPIJ0<br>16163 | XM_<br>00186<br>6351 | allatostatin receptor                  | TCAGCTGAATCCAGACGAGGCAAA | ATGACCTGAATAGGGCACCAGCAA     |
| CPIJ0<br>13095 | XM_<br>00186<br>3362 | allatostatin receptor                  | TTACAACACCACAGCCATCCCAAC | AAGATGGGCACAATCCGTGAAACG     |
| CPIJ0<br>17622 | XM_<br>00186<br>7714 | conserved hypothetical<br>protein      | TCCCGATGACCCTCATCACCATTT | CAGCCACGACAGCACAAACAGAAT     |
| CPIJ0<br>00934 | XM_<br>00184<br>2552 | conserved hypothetical<br>protein      | ATCGGCCTATTCATCACGTGGCTA | TCAGCGGGTACAACACCACGATAA     |
| CPIJ0<br>06942 | XM_<br>00184         | conserved hypothetical<br>protein      | TGTGACCCAACGGGATCCAAACTA | TCTTGAAGAACACCAGCACCGAGA     |

---

---

|                |                      |                                    |                          |                          |
|----------------|----------------------|------------------------------------|--------------------------|--------------------------|
|                | 8937                 |                                    |                          |                          |
| CPIJ0<br>17421 | XM_<br>00186<br>7456 | conserved hypothetical<br>protein  | TCTGGTGATTAGCGCGAACCTGAT | TTTCACCGTAAGGCCAGCAGTGTA |
| CPIJ0<br>11756 | XM_<br>00186<br>1921 | conserved hypothetical<br>protein  | CAGCAGCAGTTGCAGCTTAAACCA | TGGTTGAGGGTTTCCTGGTCAGAT |
| CPIJ0<br>03683 | XM_<br>00184<br>5458 | 5-hydroxytryptamine<br>receptor 2B | AACAACAGCAACCATCAACCACCG | GATTTGGCGTGCTGGCAATGTTCA |
| CPIJ0<br>11755 | XM_<br>00186<br>1920 | conserved hypothetical<br>protein  | AGCCATCGATCGCCAAGAAGAAGA | ATCGCGATGATGAAGAACGGCAAC |
| CPIJ0<br>19013 | XM_<br>00186<br>9365 | octopamine receptor<br>oamb        | GCCAAAGTTCCAGAGTTCCAAAGT | CTGGAACTCAGAAGTCCTAACTCT |
| CPIJ0<br>19017 | XM_<br>00186<br>9368 | conserved hypothetical<br>protein  | TCAGCAGAAGGAGTACTTGACGGT | AAGGGCAACCAACACAGGATGAAC |
| CPIJ0<br>16091 | XM_<br>00186<br>6585 | conserved hypothetical<br>protein  | TCCCATGTAATCATCAGCCTGTGC | GCGTGATGATGGTGGCAAAGTACA |
| CPIJ0<br>16092 | XM_<br>00186<br>6586 | adenosine A2 receptor              | TCATGATCTGCTGGATTCCGCTGT | ATGCTCATGATCAGATTGCGCAGC |
| CPIJ0<br>19039 | XM_<br>00186<br>9192 | conserved hypothetical<br>protein  | TACGTACGGTCTGGAAATGGCAGT | TGAAGCAGCTCCAACAACCTCTGA |
| CPIJ0<br>00647 | XM_<br>00184<br>2358 | conserved hypothetical<br>protein  | TCATGGGCGTCTTCCTAGTTTGCT | AGATGATCGGATTGAACGCGGAGT |
| CPIJ0          | XM_                  | d(1a,b) dopamine                   | AATGGCGTCAAGTACGAAACGTGC | GCAGCAGTTGGACTGCAGTAGATT |

---

---

00649 00184 receptor  
2360

---

“a” Gene identification number in *Culex quinquefasciatus* genome

“b” Genes were annotated by Vector Database.

“c” The primers were designed according to sequences of each of corresponding genes.

Table S2. Relative expression of GPCR and GPCR-related genes in different mosquito strains of *Cx. quinquefasciatus*

| Transcript ID <sup>a</sup> | Larva <sup>b</sup> |                     |                     |                     |                     | Adult <sup>c</sup> |                     |                     |                     |                     |
|----------------------------|--------------------|---------------------|---------------------|---------------------|---------------------|--------------------|---------------------|---------------------|---------------------|---------------------|
|                            | S-Lab              | HAmCq <sup>G0</sup> | HAmCq <sup>G8</sup> | MAmCq <sup>G0</sup> | MAmCq <sup>G6</sup> | S-Lab              | HAmCq <sup>G0</sup> | HAmCq <sup>G8</sup> | MAmCq <sup>G0</sup> | MAmCq <sup>G6</sup> |
| CPIJ013660                 | 1.00               | 1.54±0.08           | 1.25±0.44           | 2.10±0.41           | 2.49±1.11           | 5.46±0.51          | 15.91±1.07          | 19.81±4.54          | 19.03±2.79          | 24.44±5.14          |
| CPIJ015294                 | 1.00               | 0.74±0.15           | 0.53±0.05           | 1.70±0.04           | 0.29±0.16           | 1.22±0.12          | 1.95±0.66           | 1.88±0.69           | 1.03±0.49           | 1.00±0.28           |
| CPIJ019015                 | 1.00               | 1.17±0.18           | 1.13±0.69           | 1.61±0.21           | 0.85±0.11           | 2.41±0.21          | 2.49±0.49           | 3.57±1.82           | 3.39±0.77           | 2.02±0.30           |
| CPIJ018698                 | 1.00               | 1.47±0.28           | 1.03±0.06           | 2.91±0.90           | 0.68±0.19           | 2.25±0.30          | 3.7±0.01            | 2.62±0.69           | 3.45±1.79           | 1.25±0.47           |
| CPIJ001044                 | 1.00               | 0.70±0.25           | 0.70±0.21           | 1.30±0.49           | 0.60±0.25           | 1.51±0.20          | 1.22±0.40           | 1.41±0.42           | 1.12±0.15           | 2.52±1.70           |
| CPIJ008330                 | 1.00               | 0.93±0.04           | 0.63±0.18           | 1.10±0.24           | 1.08±0.25           | 4.71±3.39          | 4.13±0.71           | 9.35±3.75           | 7.25±0.07           | 9.85±3.04           |
| CPIJ011883                 | 1.00               | 0.65±0.07           | 0.45±0.21           | 0.90±0.14           | 0.35±0.21           | 3.75±0.49          | 3.25±0.35           | 4.90±0.99           | 3.15±0.21           | 5.10±0.99           |
| CPIJ003188                 | 1.00               | 0.80±0.07           | 0.45±0.21           | 1.10±0.35           | 0.95±0.21           | 3.81±1.77          | 1.91±1.31           | 3.00±0.14           | 3.10±1.21           | 3.20±1.77           |
| CPIJ016039                 | 1.00               | 0.57±0.04           | 0.56±0.30           | 0.71±0.38           | 0.34±0.16           | 0.75±0.30          | 1.35±0.88           | 0.99±0.37           | 1.00±0.01           | 1.50±0.37           |
| CPIJ015747                 | 1.00               | 0.46±0.07           | 0.58±0.26           | 1.12±0.93           | 0.23±0.06           | 0.86±0.32          | 1.01±0.36           | 0.90±0.46           | 0.99±0.54           | 0.80±0.34           |
| CPIJ014487                 | 1.00               | 0.70±0.01           | 0.80±0.05           | 1.02±0.33           | 0.67±0.01           | 0.78±0.03          | 2.03±0.06           | 0.59±0.19           | 3.55±1.63           | 0.65±0.13           |
| CPIJ013218                 | 1.00               | 0.98±0.18           | 0.84±0.15           | 1.30±0.43           | 1.63±0.10           | 12.55±4.88         | 4.59±2.11           | 4.94±0.19           | 6.06±0.65           | 5.62±0.12           |
| CPIJ003421                 | 1.00               | 1.80±0.21           | 0.45±0.07           | 2.20±1.41           | 2.35±0.21           | 3.10±1.27          | 2.90±0.77           | 3.20±0.01           | 4.40±0.85           | 2.10±1.45           |
| CPIJ014065                 | 1.00               | 0.60±0.01           | 0.30±0.14           | 2.30±1.84           | 0.60±0.28           | 2.95±1.34          | 0.90±0.01           | 0.90±0.14           | 3.10±1.27           | 2.00±0.14           |
| CPIJ005574                 | 1.00               | 2.40±0.14           | 2.20±0.90           | 1.80±0.44           | 2.20±0.71           | 1.70±1.00          | 3.70±1.36           | 1.75±0.21           | 3.35±0.21           | 2.70±0.92           |
| CPIJ016281                 | 1.00               | 1.53±0.27           | 1.08±0.27           | 3.24±0.60           | 0.94±0.18           | 2.29±0.83          | 11.66±0.24          | 7.52±2.04           | 6.78±1.89           | 4.01±0.16           |
| CPIJ013069                 | 1.00               | 1.05±0.07           | 0.90±0.14           | 1.35±0.64           | 0.75±0.35           | 1.50±0.57          | 2.70±0.14           | 1.90±0.01           | 1.60±0.57           | 1.95±0.49           |
| CPIJ007187                 | 1.00               | 3.00±0.85           | 1.60±0.21           | 2.80±0.57           | 1.50±0.42           | 5.20±0.78          | 4.90±0.71           | 5.21±0.71           | 4.12±0.49           | 2.90±0.85           |
| CPIJ006984                 | 1.00               | 1.90±0.01           | 0.90±0.23           | 1.40±1.06           | 1.72±0.21           | 7.10±0.01          | 5.40±0.21           | 5.50±1.97           | 5.60±0.92           | 6.20±2.00           |
| CPIJ018265                 | 1.00               | 1.35±0.55           | 1.12±0.91           | 4.82±1.46           | 2.04±1.12           | 1.77±0.12          | 3.06±0.16           | 1.62±0.06           | 9.96±1.00           | 1.68±0.04           |
| CPIJ014670                 | 1.00               | 0.85±0.21           | 1.17±0.24           | 1.63±0.24           | 0.40±0.28           | 1.83±0.25          | 1.60±0.57           | 4.35±0.91           | 3.34±1.04           | 5.67±2.07           |
| CPIJ012071                 | 1.00               | 1.00±0.28           | 1.20±0.28           | 1.40±0.42           | 0.95±0.35           | 0.75±0.07          | 0.80±0.14           | 0.60±0.14           | 0.70±0.14           | 0.80±0.14           |
| CPIJ018504                 | 1.00               | 1.17±0.10           | 1.19±0.06           | 1.28±0.34           | 1.54±0.60           | 2.68±0.73          | 5.94±1.47           | 1.91±1.03           | 1.33±0.49           | 2.63±0.02           |
| CPIJ010469                 | 1.00               | 1.24±0.23           | 0.94±0.05           | 1.08±0.28           | 1.55±0.36           | 0.89±0.45          | 3.64±1.32           | 1.91±1.43           | 2.04±1.18           | 2.55±0.35           |
| CPIJ011191                 | 1.00               | 0.70±0.07           | 0.70±0.07           | 1.70±0.01           | 0.90±0.14           | 7.20±0.07          | 6.25±1.06           | 8.80±1.41           | 11.11±1.41          | 8.60±0.78           |
| CPIJ003158                 | 1.00               | 2.05±0.25           | 0.50±0.20           | 2.15±0.37           | 0.90±0.25           | 9.20±1.39          | 7.00±1.00           | 9.30±1.53           | 11.50±3.54          | 22.00±6.08          |
| CPIJ011716                 | 1.00               | 1.45±0.52           | 0.75±0.16           | 4.90±0.14           | 0.45±0.07           | 17.50±9.19         | 13.65±2.33          | 12.67±2.35          | 23.26±5.30          | 9.25±1.90           |
| CPIJ016695                 | 1.00               | 0.80±0.28           | 0.60±0.01           | 1.50±2.40           | 0.65±0.35           | 0.95±0.07          | 1.45±0.35           | 1.00±0.28           | 1.50±0.70           | 1.50±0.42           |
| CPIJ006269                 | 1.00               | 0.95±0.15           | 0.50±0.01           | 1.45±0.78           | 1.45±0.64           | 1.15±0.44          | 1.50±0.32           | 0.91±0.15           | 0.65±0.21           | 0.57±0.12           |
| CPIJ007712                 | 1.00               | 1.70±0.85           | 0.85±0.07           | 1.60±0.14           | 1.25±0.35           | 3.30±1.77          | 2.20±0.14           | 2.70±1.63           | 1.85±0.07           | 2.10±0.49           |

|            |      |           |           |           |           |              |               |               |               |               |
|------------|------|-----------|-----------|-----------|-----------|--------------|---------------|---------------|---------------|---------------|
| CPIJ011619 | 1.00 | 0.90±0.29 | 1.41±0.28 | 3.08±1.31 | 3.00±1.98 | 2.23±0.24    | 0.85±0.01     | 0.73±0.39     | 1.04±0.51     | 1.32±0.03     |
| CPIJ001199 | 1.00 | 1.15±0.06 | 0.95±0.06 | 0.85±0.21 | 0.53±0.15 | 0.70±0.28    | 0.65±0.21     | 0.80±0.01     | 0.60±0.14     | 0.95±0.14     |
| CPIJ005000 | 1.00 | 1.50±0.06 | 1.20±0.25 | 2.25±0.21 | 0.83±0.29 | 126.00±11.31 | 143.00±24.00  | 126.00±8.49   | 106.00±22.63  | 150.50±4.95   |
| CPIJ009246 | 1.00 | 1.83±0.04 | 0.60±0.07 | 1.14±0.76 | 0.50±0.42 | 9.43±2.02    | 16.17±2.74    | 18.48±11.14   | 11.86±3.03    | 13.25±0.35    |
| CPIJ013408 | 1.00 | 1.35±0.35 | 0.80±0.42 | 1.10±0.71 | 0.70±0.85 | 120.00±32.53 | 87.50±0.71    | 105.50±45.96  | 158.00±21.21  | 122.00±10.00  |
| CPIJ004067 | 1.00 | 4.50±1.25 | 2.10±0.42 | 1.55±0.07 | 1.10±0.42 | 1.20±0.14    | 1.80±1.14     | 1.10±0.14     | 1.30±0.26     | 2.20±0.14     |
| CPIJ012052 | 1.00 | 1.55±0.35 | 1.05±0.07 | 1.75±0.49 | 0.45±0.21 | 961.00±27.01 | 1224.00±23.76 | 1026.00±31.21 | 1022.00±37.77 | 1138.00±14.38 |
| CPIJ011571 | 1.00 | 1.60±0.60 | 0.70±0.12 | 2.50±0.57 | 0.85±0.07 | 344.00±30.41 | 264.00±45.86  | 313.00±24.75  | 364.00±13.96  | 330.00±16.61  |
| CPIJ011573 | 1.00 | 1.30±0.21 | 0.30±0.01 | 0.80±0.01 | 0.35±0.21 | 0.01±0.001   | 0.01±0.004    | 0.01±0.004    | 0.01±0.004    | 0.02±0.001    |
| CPIJ011574 | 1.00 | 1.40±0.07 | 0.55±0.21 | 1.35±0.78 | 0.55±0.21 | 0.25±0.05    | 0.20±0.01     | 0.15±0.07     | 0.08±0.02     | 0.17±0.03     |
| CPIJ011983 | 1.00 | 0.65±0.21 | 0.65±0.07 | 1.40±0.71 | 0.50±0.28 | 1.45±0.21    | 1.25±0.07     | 1.45±0.21     | 1.85±0.64     | 1.60±0.28     |
| CPIJ013056 | 1.00 | 1.05±0.07 | 0.65±0.07 | 0.65±0.07 | 0.25±0.01 | 0.35±0.21    | 0.15±0.07     | 0.20±0.14     | 0.15±0.07     | 0.10±0.01     |
| CPIJ011419 | 1.00 | 1.30±0.28 | 1.15±0.07 | 3.30±0.01 | 1.35±0.21 | 8.40±3.32    | 12.50±4.80    | 14.30±0.57    | 15.50±1.06    | 9.40±0.57     |
| CPIJ014334 | 1.00 | 0.70±0.01 | 0.25±0.07 | 0.60±0.14 | 0.70±0.42 | 1.00±0.01    | 0.60±0.10     | 1.05±0.17     | 0.95±0.07     | 2.30±0.29     |
| CPIJ015116 | 1.00 | 0.76±0.34 | 0.30±0.06 | 0.83±0.21 | 0.51±0.01 | 2.89±0.98    | 1.59±0.34     | 1.64±0.53     | 1.82±0.43     | 1.42±0.32     |
| CPIJ000143 | 1.00 | 0.50±0.23 | 0.40±0.15 | 0.90±0.42 | 0.55±0.21 | 12.00±2.83   | 2.20±0.64     | 4.90±0.60     | 4.30±0.70     | 5.60±2.33     |
| CPIJ006507 | 1.00 | 1.20±0.51 | 1.00±0.14 | 0.80±0.57 | 0.67±0.31 | 6.80±1.13    | 4.30±0.81     | 4.25±0.35     | 9.10±2.76     | 6.90±1.23     |
| CPIJ011547 | 1.00 | 1.10±0.01 | 0.80±0.14 | 1.20±0.01 | 0.90±0.42 | 5.50±0.10    | 6.90±0.01     | 11.20±3.68    | 18.60±4.10    | 11.00±0.92    |
| CPIJ011549 | 1.00 | 1.10±0.14 | 0.95±0.21 | 3.10±1.27 | 0.85±0.21 | 3.30±0.42    | 2.30±0.49     | 2.80±0.28     | 3.90±0.14     | 1.80±0.10     |
| CPIJ017258 | 1.00 | 1.81±0.24 | 0.43±0.27 | 5.65±3.05 | 1.93±0.28 | 1.94±0.03    | 2.11±0.45     | 1.31±0.31     | 12.76±1.19    | 1.60±0.52     |
| CPIJ011559 | 1.00 | 1.30±0.07 | 0.80±0.01 | 3.80±1.06 | 1.00±0.14 | 5.40±0.57    | 6.80±0.57     | 7.40±0.99     | 8.30±1.41     | 5.35±0.14     |
| CPIJ014419 | 1.00 | 0.64±0.33 | 0.72±0.11 | 0.79±0.25 | 2.08±0.28 | 2.85±0.08    | 2.80±1.56     | 9.49±0.97     | 3.90±2.40     | 5.65±0.35     |
| CPIJ009749 | 1.00 | 1.20±0.28 | 0.40±0.01 | 2.60±1.48 | 0.70±0.14 | 12.40±3.27   | 15.00±5.14    | 11.00±1.70    | 14.00±5.02    | 12.30±2.12    |
| CPIJ008822 | 1.00 | 1.10±0.49 | 0.60±0.21 | 1.20±0.85 | 0.80±0.35 | 10.00±2.55   | 4.85±0.25     | 12.00±2.55    | 7.15±1.56     | 6.50±0.99     |
| CPIJ013929 | 1.00 | 0.50±0.14 | 0.25±0.07 | 0.50±0.01 | 0.25±0.07 | 7.40±0.57    | 2.65±0.07     | 2.95±1.06     | 5.40±1.84     | 4.05±0.78     |
| CPIJ008641 | 1.00 | 2.50±1.91 | 1.30±0.92 | 2.10±0.49 | 1.10±0.49 | 2.90±0.80    | 2.50±0.10     | 6.40±1.45     | 3.20±1.13     | 4.60±0.99     |
| CPIJ002466 | 1.00 | 1.10±0.35 | 0.85±0.31 | 1.10±0.35 | 0.75±0.35 | 4.20±0.64    | 3.30±1.15     | 5.00±1.71     | 3.30±0.89     | 2.40±1.10     |
| CPIJ008111 | 1.00 | 1.20±0.71 | 0.75±0.49 | 1.15±0.21 | 0.40±0.14 | 2.40±0.78    | 1.55±0.71     | 2.80±0.49     | 1.70±0.71     | 2.15±0.07     |
| CPIJ016970 | 1.00 | 1.07±0.23 | 0.55±0.11 | 1.61±0.18 | 0.45±0.10 | 3.96±1.46    | 2.11±0.23     | 1.43±0.18     | 1.44±0.35     | 1.13±0.30     |
| CPIJ007717 | 1.00 | 0.92±0.54 | 0.76±0.06 | 0.75±0.21 | 2.05±0.09 | 1.95±0.06    | 5.36±3.33     | 6.08±2.66     | 2.15±1.20     | 3.60±0.25     |
| CPIJ014671 | 1.00 | 0.56±0.20 | 0.33±0.04 | 0.64±0.06 | 0.63±0.05 | 2.35±0.07    | 1.95±0.85     | 0.69±0.16     | 0.79±0.12     | 1.95±1.06     |
| CPIJ000410 | 1.00 | 0.90±0.17 | 0.95±0.07 | 1.10±0.42 | 1.00±0.35 | 2.25±0.49    | 1.45±0.35     | 1.20±0.35     | 1.20±0.66     | 1.11±0.29     |
| CPIJ011757 | 1.00 | 1.18±0.25 | 0.55±0.12 | 1.11±0.28 | 0.35±0.21 | 1.41±0.14    | 4.03±2.02     | 2.30±0.13     | 2.81±0.43     | 1.25±0.21     |
| CPIJ020007 | 1.00 | 0.37±0.09 | 0.23±0.18 | 0.59±0.18 | 0.47±0.23 | 1.45±0.21    | 0.90±0.67     | 0.94±0.27     | 1.39±0.08     | 1.49±0.04     |

|            |      |           |           |           |           |           |            |            |            |           |
|------------|------|-----------|-----------|-----------|-----------|-----------|------------|------------|------------|-----------|
| CPIJ011105 | 1.00 | 0.70±0.49 | 0.60±0.14 | 1.90±1.27 | 1.50±0.71 | 1.00±0.28 | 0.90±0.10  | 0.70±0.14  | 3.40±0.21  | 2.10±1.20 |
| CPIJ011106 | 1.00 | 0.76±0.49 | 0.30±0.10 | 0.73±0.24 | 0.30±0.13 | 0.30±0.01 | 0.40±0.01  | 0.30±0.19  | 0.50±0.01  | 0.50±0.35 |
| CPIJ009459 | 1.00 | 0.50±0.14 | 0.30±0.11 | 0.60±0.01 | 0.50±0.14 | 2.70±1.13 | 2.10±0.57  | 2.20±1.42  | 2.10±0.99  | 2.00±0.28 |
| CPIJ019111 | 1.00 | 1.21±0.01 | 2.81±0.10 | 1.10±0.01 | 1.67±0.11 | 0.68±0.15 | 0.73±0.23  | 0.51±0.21  | 0.88±0.15  | 0.77±0.16 |
| CPIJ000002 | 1.00 | 1.45±0.07 | 1.45±0.35 | 1.75±0.07 | 1.65±0.17 | 4.50±2.06 | 2.80±0.28  | 3.85±1.06  | 3.80±0.14  | 4.65±0.07 |
| CPIJ018293 | 1.00 | 0.66±0.14 | 0.32±0.14 | 0.58±0.06 | 0.29±0.01 | 0.95±0.27 | 1.54±0.95  | 0.61±0.13  | 0.68±0.41  | 0.82±0.01 |
| CPIJ015979 | 1.00 | 0.65±0.01 | 0.57±0.14 | 0.73±0.18 | 0.60±0.39 | 1.27±0.45 | 1.99±0.01  | 1.37±0.08  | 1.78±0.74  | 1.36±0.96 |
| CPIJ019916 | 1.00 | 1.06±0.31 | 0.67±0.06 | 1.23±0.08 | 1.76±0.86 | 4.99±0.06 | 2.69±1.99  | 1.60±0.64  | 2.19±0.62  | 1.78±0.45 |
| CPIJ014753 | 1.00 | 0.82±0.16 | 1.07±0.23 | 2.48±0.33 | 2.81±0.07 | 1.30±0.71 | 3.49±0.22  | 3.98±1.15  | 2.71±0.13  | 1.61±0.11 |
| CPIJ002213 | 1.00 | 0.80±0.14 | 0.45±0.07 | 2.15±0.28 | 1.40±0.26 | 2.70±0.14 | 7.10±3.96  | 5.05±0.07  | 7.80±0.99  | 3.45±0.64 |
| CPIJ003422 | 1.00 | 1.50±0.26 | 0.73±0.17 | 1.45±0.35 | 1.30±0.14 | 1.20±0.21 | 0.90±0.23  | 1.21±0.32  | 1.70±0.85  | 1.20±0.55 |
| CPIJ003420 | 1.00 | 1.20±0.15 | 0.55±0.06 | 1.30±0.20 | 0.53±0.06 | 0.60±0.50 | 1.10±0.01  | 1.30±0.42  | 0.80±0.21  | 0.75±0.07 |
| CPIJ013535 | 1.00 | 0.95±0.07 | 0.75±0.07 | 3.05±1.56 | 1.25±0.21 | 7.45±0.21 | 3.75±1.48  | 5.56±3.54  | 8.00±0.71  | 7.35±3.75 |
| CPIJ013536 | 1.00 | 1.45±0.64 | 0.70±0.14 | 3.60±1.84 | 0.65±0.49 | 4.00±0.20 | 1.75±0.15  | 4.50±1.00  | 4.65±0.21  | 5.25±2.05 |
| CPIJ016679 | 1.00 | 1.32±0.01 | 0.53±0.26 | 1.44±0.74 | 1.32±0.96 | 3.67±0.21 | 2.12±0.21  | 3.15±1.63  | 1.77±0.52  | 1.65±0.51 |
| CPIJ011717 | 1.00 | 0.80±0.57 | 0.50±0.01 | 1.50±0.85 | 0.50±0.42 | 7.05±1.77 | 5.10±0.99  | 3.45±0.07  | 4.60±1.70  | 3.10±1.70 |
| CPIJ016293 | 1.00 | 1.03±0.47 | 0.33±0.05 | 0.96±0.64 | 0.51±0.15 | 3.44±0.64 | 3.41±0.47  | 2.43±1.75  | 4.11±1.51  | 3.68±2.59 |
| CPIJ007715 | 1.00 | 1.90±0.21 | 1.25±0.07 | 1.75±0.49 | 0.75±0.35 | 8.60±0.21 | 5.80±0.57  | 8.95±1.34  | 7.70±0.71  | 8.05±1.48 |
| CPIJ007716 | 1.00 | 1.00±0.38 | 0.75±0.25 | 1.00±0.54 | 0.40±0.14 | 4.30±1.62 | 2.70±0.64  | 3.85±0.07  | 4.15±0.64  | 4.00±0.12 |
| CPIJ018158 | 1.00 | 0.64±0.04 | 0.55±0.12 | 0.97±0.02 | 1.18±0.04 | 0.44±0.24 | 0.62±0.18  | 0.49±0.14  | 0.80±0.70  | 0.36±0.16 |
| CPIJ007681 | 1.00 | 1.20±0.42 | 0.60±0.07 | 2.80±0.49 | 0.80±0.71 | 3.40±1.63 | 1.80±0.28  | 1.80±0.78  | 1.90±0.42  | 1.30±0.42 |
| CPIJ007676 | 1.00 | 3.10±0.28 | 1.25±0.07 | 4.90±0.71 | 1.25±0.07 | 0.95±0.07 | 2.45±0.07  | 1.55±0.21  | 1.60±0.42  | 1.25±0.07 |
| CPIJ007677 | 1.00 | 4.50±1.41 | 1.10±0.01 | 5.50±0.15 | 2.90±0.28 | 2.00±1.20 | 4.05±0.07  | 3.10±0.85  | 3.30±0.85  | 3.85±0.14 |
| CPIJ007682 | 1.00 | 1.05±0.28 | 0.65±0.07 | 3.15±1.27 | 1.90±0.01 | 2.50±0.57 | 1.30±0.14  | 1.60±0.42  | 2.00±1.13  | 2.00±0.99 |
| CPIJ008820 | 1.00 | 9.70±1.13 | 3.45±1.34 | 2.65±0.92 | 1.60±0.01 | 1.40±0.28 | 12.70±0.99 | 11.70±5.09 | 12.90±1.52 | 8.90±1.23 |
| CPIJ000651 | 1.00 | 1.70±0.35 | 1.25±0.07 | 1.60±0.50 | 0.80±0.42 | 6.90±0.49 | 7.90±0.14  | 11.00±1.41 | 8.00±0.78  | 5.85±3.61 |
| CPIJ016678 | 1.00 | 0.57±0.17 | 0.85±0.13 | 0.75±0.12 | 0.81±0.45 | 0.96±0.66 | 2.62±1.08  | 1.64±0.01  | 1.92±0.66  | 5.78±2.16 |
| CPIJ019566 | 1.00 | 0.80±0.22 | 0.82±0.16 | 0.70±0.23 | 1.44±0.18 | 1.95±0.13 | 1.24±0.96  | 0.81±0.38  | 1.28±0.58  | 1.93±1.42 |
| CPIJ011881 | 1.00 | 0.65±0.07 | 0.45±0.07 | 1.10±0.57 | 0.25±0.07 | 1.30±0.28 | 1.60±0.42  | 1.95±0.07  | 1.95±0.21  | 2.15±0.07 |
| CPIJ016282 | 1.00 | 1.17±0.71 | 0.93±0.08 | 0.81±0.18 | 0.55±0.11 | 1.91±0.27 | 3.32±0.55  | 1.81±0.28  | 2.17±0.23  | 1.14±0.63 |
| CPIJ006268 | 1.00 | 0.95±0.51 | 0.80±0.06 | 2.10±0.78 | 0.60±0.01 | 1.65±0.50 | 1.40±0.06  | 1.30±0.40  | 1.25±0.25  | 1.41±0.20 |
| CPIJ003873 | 1.00 | 1.80±0.32 | 0.70±0.21 | 3.80±0.35 | 1.80±0.16 | 3.40±0.71 | 3.10±0.99  | 4.10±1.41  | 4.40±0.64  | 5.00±0.01 |
| CPIJ014488 | 1.00 | 0.79±0.36 | 0.96±0.06 | 1.94±0.66 | 0.50±0.28 | 1.88±0.04 | 2.70±1.70  | 7.26±3.80  | 8.66±0.51  | 3.00±1.70 |
| CPIJ014409 | 1.00 | 1.02±0.25 | 0.90±0.33 | 2.20±0.29 | 1.90±0.46 | 2.61±0.13 | 5.40±4.10  | 10.18±0.88 | 4.10±1.63  | 9.72±1.29 |

|            |      |           |           |           |           |            |            |            |            |            |
|------------|------|-----------|-----------|-----------|-----------|------------|------------|------------|------------|------------|
| CPIJ011118 | 1.00 | 1.20±0.35 | 1.55±0.49 | 3.90±1.41 | 2.20±0.92 | 12.30±1.70 | 12.30±2.76 | 23.70±1.70 | 27.50±3.46 | 11.70±0.42 |
| CPIJ016163 | 1.00 | 0.30±0.24 | 0.52±0.09 | 0.75±0.20 | 0.28±0.02 | 2.22±0.17  | 2.28±0.08  | 1.78±0.90  | 2.24±0.56  | 3.86±0.16  |
| CPIJ013095 | 1.00 | 1.05±0.21 | 0.95±0.35 | 1.85±1.34 | 0.55±0.35 | 2.50±1.70  | 3.65±0.49  | 2.60±1.13  | 5.10±2.83  | 2.65±1.06  |
| CPIJ017622 | 1.00 | 2.32±0.02 | 1.58±0.55 | 1.58±0.17 | 0.72±0.18 | 4.36±1.81  | 3.67±1.27  | 3.09±1.90  | 44.25±9.80 | 2.23±0.07  |
| CPIJ000934 | 1.00 | 0.50±0.32 | 0.80±0.35 | 0.90±0.26 | 0.50±0.32 | 2.10±0.29  | 3.10±1.30  | 2.50±1.03  | 2.90±0.20  | 7.40±2.33  |
| CPIJ006942 | 1.00 | 1.50±0.28 | 1.40±0.35 | 2.25±0.71 | 0.90±0.31 | 1.15±0.14  | 1.50±0.21  | 1.60±0.25  | 0.95±0.21  | 1.95±0.35  |
| CPIJ017421 | 1.00 | 1.78±0.39 | 0.46±0.33 | 1.09±0.31 | 0.66±0.19 | 2.95±0.33  | 3.20±0.91  | 1.73±0.49  | 10.32±0.51 | 1.77±0.01  |
| CPIJ011756 | 1.00 | 0.44±0.63 | 0.80±0.28 | 0.83±0.04 | 0.30±0.28 | 0.71±0.27  | 1.95±0.36  | 3.30±1.27  | 0.69±0.27  | 1.80±0.01  |
| CPIJ003683 | 1.00 | 1.70±0.23 | 0.60±0.23 | 1.70±0.21 | 1.15±0.21 | 2.10±0.85  | 1.70±0.42  | 2.60±0.64  | 3.00±1.27  | 2.70±0.92  |
| CPIJ011755 | 1.00 | 0.85±0.49 | 0.65±0.21 | 1.05±0.49 | 0.40±0.14 | 0.65±0.21  | 1.70±0.71  | 1.40±0.42  | 1.50±0.71  | 1.55±0.78  |
| CPIJ019013 | 1.00 | 1.18±0.49 | 0.67±0.25 | 0.99±0.30 | 0.51±0.06 | 1.32±0.62  | 2.17±0.19  | 2.56±0.17  | 2.69±0.38  | 2.31±0.78  |
| CPIJ019017 | 1.00 | 0.75±0.28 | 0.66±0.30 | 1.58±0.31 | 1.46±0.54 | 2.23±0.67  | 0.96±0.36  | 2.86±1.22  | 3.26±0.16  | 1.14±0.28  |
| CPIJ016091 | 1.00 | 0.69±0.30 | 0.76±0.04 | 1.48±0.19 | 0.55±0.01 | 2.17±0.16  | 2.68±0.26  | 2.43±0.36  | 3.72±0.81  | 2.46±1.01  |
| CPIJ016092 | 1.00 | 0.99±0.77 | 0.75±0.13 | 1.41±0.16 | 0.64±0.06 | 5.53±1.85  | 5.42±1.87  | 3.25±0.81  | 5.74±0.24  | 4.89±1.08  |
| CPIJ019039 | 1.00 | 1.56±0.17 | 1.18±0.14 | 1.48±0.07 | 1.21±0.11 | 3.93±1.25  | 8.16±2.03  | 5.52±0.03  | 2.06±0.01  | 2.52±0.26  |
| CPIJ000647 | 1.00 | 1.10±0.07 | 0.50±0.21 | 0.65±0.06 | 0.65±0.21 | 2.31±0.56  | 1.55±0.14  | 2.15±0.72  | 1.73±0.32  | 0.90±0.14  |
| CPIJ000649 | 1.00 | 0.83±0.25 | 0.60±0.14 | 0.63±0.06 | 0.75±0.21 | 3.10±0.14  | 1.30±0.20  | 0.75±0.14  | 1.30±1.34  | 0.40±0.17  |

“a” Gene identification number in *Culex quinquefasciatus* genome

“b” 4<sup>th</sup> instar larva

“c” 3-days old adult without blood feeding



Table S3. Oligonucleotide primers used in dsRNA and qRT-PCR reactions

| Transcript ID | Gene                           | Primer name          | Primer sequence                              |
|---------------|--------------------------------|----------------------|----------------------------------------------|
| CPIJ019111    | conserved hypothetical protein | dsRNA CPIJ019111 F   | 5'TAATACGACTCACTATAGCGGAGGGCAAGTGCATATAA3'   |
|               |                                | dsRNA CPIJ019111 R   | 5'TAATACGACTCACTATAGTCAAAGACGTGTGGCTACTG3'   |
| CPIJ007717    | conserved hypothetical protein | dsRNA CPIJ007717 F   | 5'TAATACGACTCACTATAGGTATGGCTGGTGGCACTT3'     |
|               |                                | dsRNA CPIJ007717 R   | 5'TAATACGACTCACTATAGCCGTGAAATCCGGTGCT3'      |
| CPIJ014419    | calcitonin receptor            | dsRNA CPIJ014419 F   | 5'TAATACGACTCACTATAGCCTCAAATGTGCCCGGATAA3'   |
|               |                                | dsRNA CPIJ014419 R   | 5'TAATACGACTCACTATAGACGAAGAGGCCCTGAAATG3'    |
| CPIJ014334    | pteropsin                      | dsRNA CPIJ014334 F   | 5'TAATACGACTCACTATAGGCCACCACCTACATCATCTATC3' |
|               |                                | dsRNA CPIJ014334 R   | 5'TAATACGACTCACTATAGCATCTTCAGCCGGTTCTTCT3'   |
| CPIJ019111    | conserved hypothetical protein | RT-RNAi CPIJ019111 F | 5'CCATAAACTCCGCCCTTCTT3'                     |
|               |                                | RT-RNAi CPIJ019111 R | 5'GCGTATTCATCTCGTTGGATTTC3'                  |
| CPIJ007717    | conserved hypothetical protein | RT-RNAi CPIJ007717 F | 5'TTCGTTGTATGGCTGGTGGCACTT3'                 |
|               |                                | RT-RNAi CPIJ007717 R | 5'TCATCGGAATGAAGAAGGAGCCCA3'                 |
| CPIJ014419    | calcitonin receptor            | RT-RNAi CPIJ014419 F | 5'GAGCGGGTTTACGAAACGATA3'                    |
|               |                                | RT-RNAi CPIJ014419 R | 5'CTTGACTTGTGCGATCACCT3'                     |
| CPIJ014334    | pteropsin                      | RT-RNAi CPIJ014334 F | 5'GGAAACGCAAACCCTGAAC3'                      |
|               |                                | RT-RNAi CPIJ014334 R | 5'GACAATGATGTTGGTGTAGCTG3'                   |
| CPIJ014218    | P450CYP9M10                    | qRTP450-1CxF         | 5'ATGCAGACCAAGTGCTTCCTGTAC3'                 |
| CPIJ010543    | P450CYP9J40                    | qRTP450-1CxR         | 5'AACCCACTCAACGTATCCAGCGAA3'                 |
|               |                                | qRTP450-23CxF        | 5'ACCCGAATCCGGGCAAGTTTGAT3'                  |
| CPIJ010546    | P450CYP9J34                    | qRTP450-23CxR        | 5'AACTCCAAACGGTAAATACGCCGC3'                 |
|               |                                | qRTP45010546F        | 5'ATCCGATGTCCGTAAGTGCAGGT3'                  |
| CPIJ005959    | P450CYP6AA7                    | qRTP45010546R        | 5'TGTACCTCTGGGTTGATGGCAAGT3'                 |
|               |                                | qRTP4505959F         | 5'ATGACGCTGATTCCCGAGACTGTT3'                 |
|               |                                | qRTP4505959R         | 5'TTCATGGTCAAGGTCTCACCCGAA3'                 |
